# Supplementary material
Source: publisher figshare collection journal article supplement (https://karger.figshare.com/ndownloader/files/22747871)
Supplement: Supplementary file 1 [file 22747871]

**Supplemental Table A: Annual volume** **regressed on the level of Family interferes with Work conflict (regression coefficients and standard errors in brackets)**

|  | Model 1 | Model 2 |
| --- | --- | --- |
|  |  |  |
| Level of FIW (linear) | 1.41** (0.61) | 1.28* (0.55) |
| Level of FIW (quadratic) | -0.39† (0.23) | -0.35† (0.20) |
| Gender (Ref: women) |  | 2.30*** (0.44) |
| Age of respondent |  | -0.12 (0.20) |
| Level of employment |  | -0.55 (0.34) |
| Level of education |  | 0.72** (0.28) |
| Age of the youngest child |  | 0.05 (0.11) |
| Number of children in the household |  | 0.03 (0.18) |
| Intercept | 5.96*** (0.36) | 4.89** (1.47) |

Note. *** p<0.001; ** p<0.01; * p<0.05; † p<0.10

**Supplemental Table B: Annual volume** **regressed on the level of Work interferes with Family conflict (regression coefficients and standard errors in brackets)**

|  | Model 1 | Model 2 |
| --- | --- | --- |
|  |  |  |
| Level of WIF (linear) | 2.07*** (.55) | 1.82** (.54) |
| Level of WIF (quadratic) | -.54** (.16) | -.50** (.15) |
| Gender (Ref: women) |  | 2.23*** (.44) |
| Age of the respondent |  | -0.18 (0.20) |
| Level of employment |  | -0.56 (.34) |
| Level of education |  | 0.58* (0.29) |
| Age of the youngest child |  | 0.03 (.10) |
| Number of children in the household |  | -0.04 (.17) |
| Intercept | 5.38*** (.44) | 6.80*** (1.24) |

Note. *** p<0.001; ** p<0.01; * p<0.05
